# Supplementary material for: Controlled multistep oxidation of alcohols and aldehydes to carboxylic acids using air, sunlight and a robust metalloporphyrin sensitizer with a pH-switchable photoreactivity
Source: Royal Society of Chemistry journal article supplement (doi:10.1039/c2ra01076c), 2012-01-01
Supplement: c2ra01076c.pdf [file c2ra01076c.pdf]

## Supporting Information

### **Controlled Multistep Oxidation of Alcohols and Aldehydes to Carboxylic Acids using Air, Sunlight and a Robust Metalloporphyrin Sensitizer with a pH-switchable Photoreactivity\*\***

*Mahdi Hajimohammadi<sup>a,b</sup>, C. Schwarzinger<sup>c</sup> and Günther Knör\*<sup>a</sup>*

**Table S1.** Effect of solvent composition on the photo-oxidation of benzaldehyde by  $[\text{Sb}(\text{tpp})(\text{OH})_2]^+$  (**1**)<sup>[a]</sup>

| Entry | Solvent                                            | Conversion into benzoic acid [%] |
|-------|----------------------------------------------------|----------------------------------|
| 1     | H <sub>2</sub> O/ Acetonitrile (1:1 v/v)           | 62                               |
| 2     | H <sub>2</sub> O/ Acetonitrile (1:3 v/v)           | 63 <sup>[b]</sup>                |
| 3     | H <sub>2</sub> O/ Acetonitrile (3:1 v/v)           | 47                               |
| 4     | Acetonitrile                                       | 55 <sup>[b]</sup>                |
| 5     | H <sub>2</sub> O                                   | trace                            |
| 6     | NaN <sub>3</sub> / H <sub>2</sub> O / Acetonitrile | trace                            |

[a]  $7.8 \times 10^{-7}$  mol  $[\text{Sb}(\text{tpp})(\text{OH})_2]^+$  and  $1 \times 10^{-3}$  mol benzaldehyde after 24 h in 12ml of solvent in the presence of air and light (35000 lx, solar simulator). [b] There are traces of benzene in the product under these conditions.

**Table S2.** Effect of sensitizer on the photo-oxidation of benzaldehyde <sup>[a]</sup>

| Entry | sensitizer                            | Conversion into benzoic acid [%] |
|-------|---------------------------------------|----------------------------------|
| 1     | Sb(TPP)(OH) <sub>2</sub> <sup>+</sup> | 48                               |
| 2     | Rose bengal                           | 34                               |
| 3     | Methylene blue                        | 33                               |
| 4     | -                                     | trace                            |

[a]  $7.8 \times 10^{-7}$  mol of sensitizer and  $1 \times 10^{-3}$  mol benzaldehyde after 15 h in 10ml of H<sub>2</sub>O/Acetonitrile (1:1 v/v) in the presence of air and light (35000 lx, solar simulator)

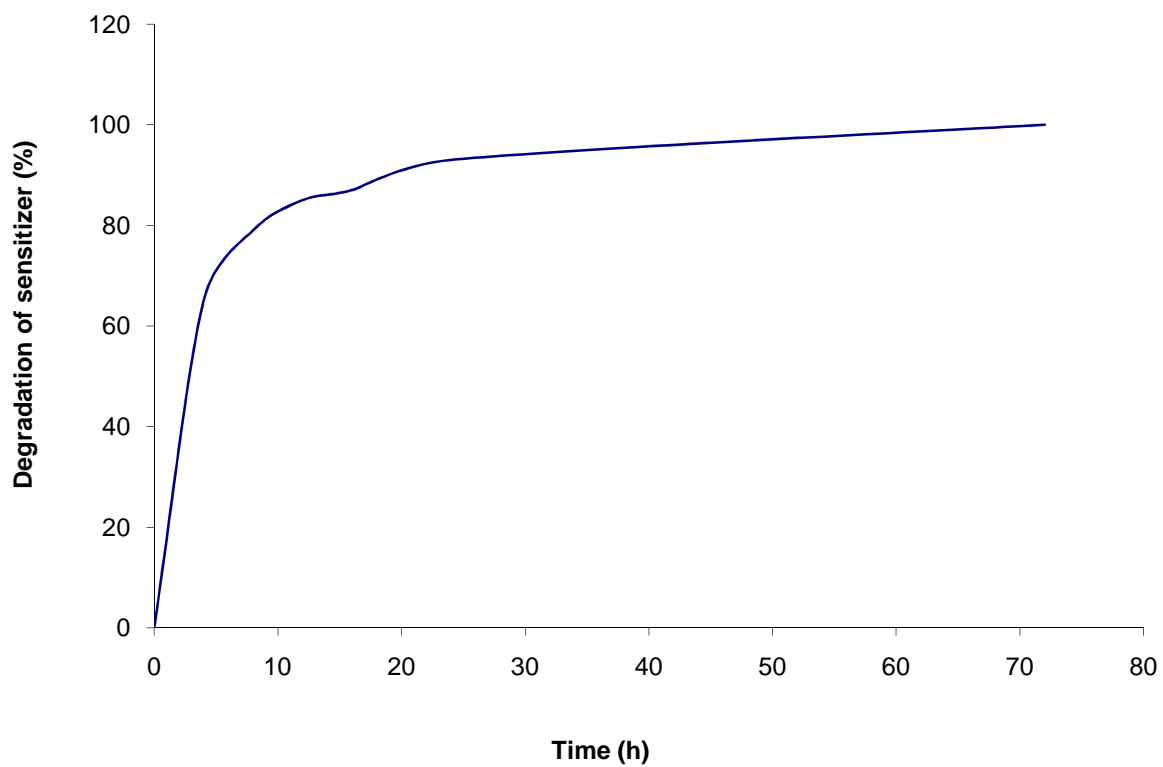

**Figure S1.** Degradation of  $[\text{Sb}(\text{tpp})(\text{OH})_2]^+$  (**1**) versus time of irradiation in  $\text{H}_2\text{O}/\text{acetonitrile}$  (1:1 v/v) in the course of the photo-oxygenation of benzaldehyde in the presence of air and light (35000 lx, solar simulator)

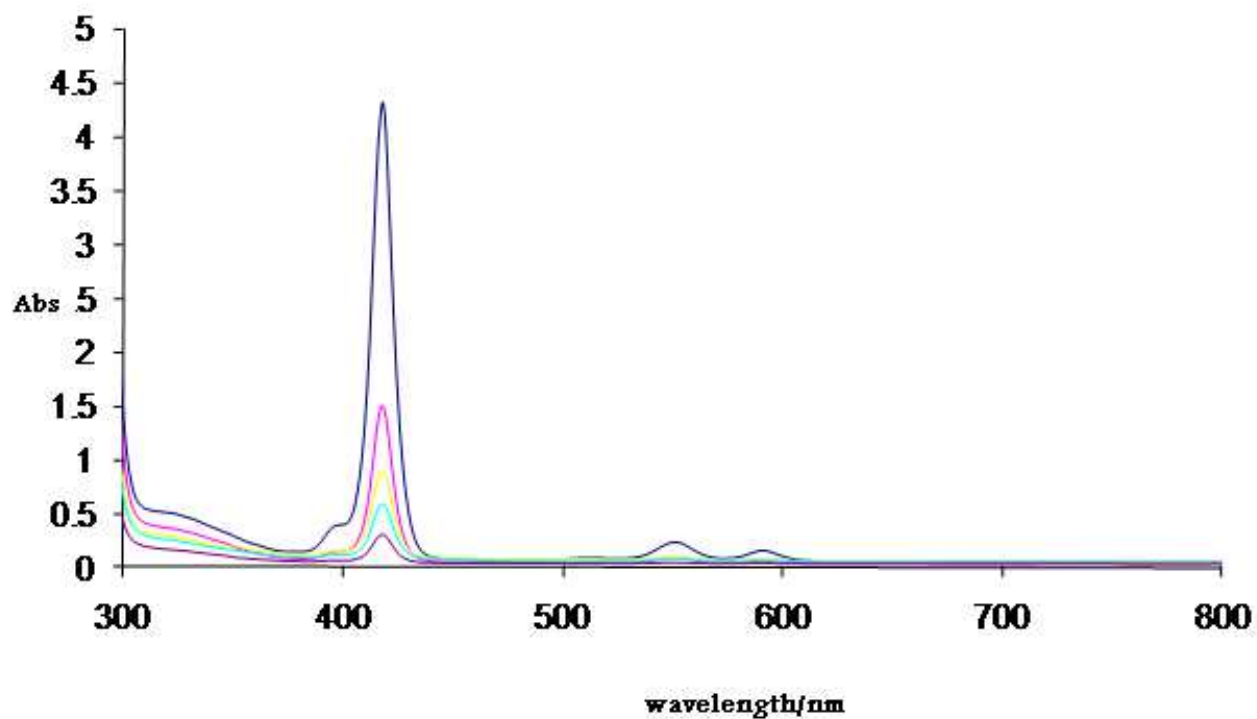

**Figure S2.** Bleaching of the absorption spectrum of [Sb(tpp)(OH)<sub>2</sub>]<sup>+</sup> (1) in the presence of light (35000 lx, solar simulator) after 0, 4, 8, 12, 16 and 24 h reaction times of <sup>1</sup>O<sub>2</sub> generation and photo-oxidation of benzaldehyde to benzoic acid.

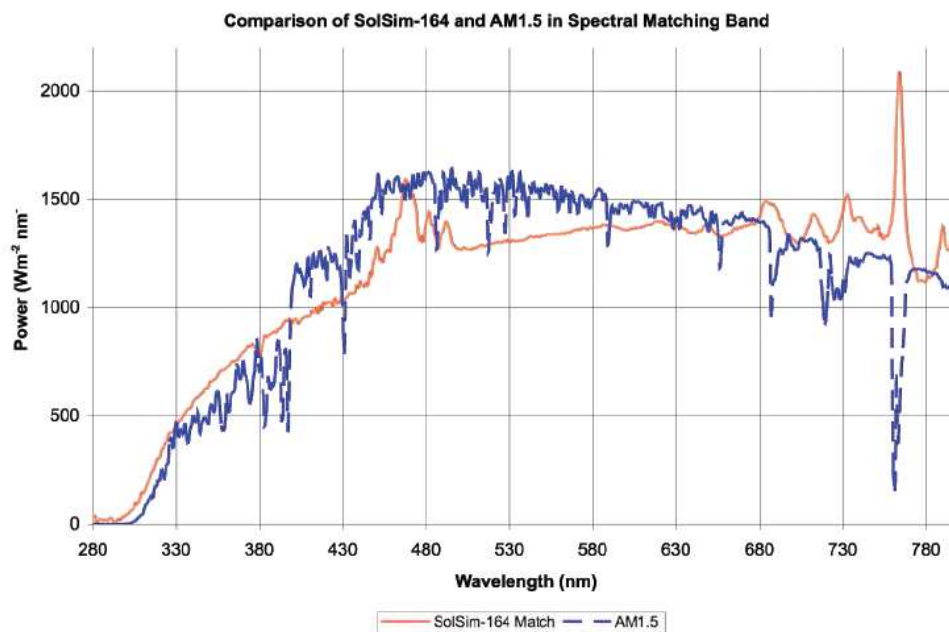

**Figure S3.** Comparison of the spectral power distribution of the solar simulator used (Luzchem photoreactor SolSim 164) and AM 1.5 sunlight exposure conditions.
